# Supplementary material
Source: publisher figshare collection journal article supplement (https://sage.figshare.com/ndownloader/files/13707950)
Supplement: Supplementary file 1 [file 13707950]

## MS Journal Appendix for MRI methodology

| Hardware                          |            |
|-----------------------------------|------------|
| Field strength                    | 3 TESLA    |
| Manufacturer                      | PHILIPS    |
| Model                             | ACHIEVA TX |
| Coil type<br>(e.g. head, surface) | HEAD       |
| Number of coil channels           |            |

| Acquisition sequence                                              |       |    |
|-------------------------------------------------------------------|-------|----|
| Type<br>(e.g. FLAIR, DIR, DTI, fMRI)                              | FLAIR |    |
| Acquisition time                                                  |       |    |
| Orientation                                                       |       |    |
| Alignment<br>(e.g. anterior commissure/poster<br>commissure line) |       |    |
| Voxel size                                                        |       |    |
| TR                                                                |       |    |
| TE                                                                |       |    |
| TI                                                                |       |    |
| Flip angle                                                        |       |    |
| NEX                                                               |       |    |
| Field of view                                                     |       |    |
| Matrix size                                                       |       |    |
| Parallel imaging                                                  | Yes   | No |
| If used, parallel imaging method:<br>(e.g. SENSE, GRAPPA)         |       |    |
| Cardiac gating                                                    | Yes   | No |
| If used, cardiac gating method:<br>(e.g. PPU or ECG)              |       |    |
| Contrast enhancement                                              | Yes   | No |

| Acquisition sequence                                                                          |              |
|-----------------------------------------------------------------------------------------------|--------------|
| If used, provide name of contrast agent, dose and timing of scan post-contrast administration | DOTAREM 15ML |
| Other parameters:                                                                             |              |

| Image analysis methods and outputs                                                                                                             |  |
|------------------------------------------------------------------------------------------------------------------------------------------------|--|
| <b>Lesions</b>                                                                                                                                 |  |
| Type<br>(e.g. Gd-enhancing, T2-hyperintense, T1-hypointense)                                                                                   |  |
| Analysis method                                                                                                                                |  |
| Analysis software                                                                                                                              |  |
| Output measure<br>(e.g. count or volume [ml])                                                                                                  |  |
| <b>Tissue volumes</b>                                                                                                                          |  |
| Type<br>(e.g. whole brain, grey matter, white matter, spinal cord)                                                                             |  |
| Analysis method                                                                                                                                |  |
| Analysis software                                                                                                                              |  |
| Output measure<br>(e.g. absolute tissue volume in ml, tissue volume as a fraction of intracranial volume, percentage change in tissue volumes) |  |
| <b>Tissue measures (e.g. MTR, DTI, T1-RT, T2-RT, T2*, T2', <sup>1</sup>H-MRS, perfusion, Na)</b>                                               |  |
| Type<br>(e.g. whole brain, grey matter, white matter, spinal cord, normal-appearing grey matter or white matter)                               |  |
| Analysis method                                                                                                                                |  |
| Analysis software                                                                                                                              |  |
| Output measure                                                                                                                                 |  |
| <b>Other MRI measures (e.g. functional MRI)</b>                                                                                                |  |
| Type<br>(e.g. whole brain, grey matter, white matter, spinal cord, normal-appearing grey matter or white matter)                               |  |
| Analysis method                                                                                                                                |  |
| Analysis software                                                                                                                              |  |
| Output measure                                                                                                                                 |  |

Other analysis details:
